# Supplementary material for: Association Mapping Reveals Genetic Loci Associated with Important Agronomic Traits in Lentinula edodes, Shiitake Mushroom
Source: PubMed Central journal article supplement (PMC5314409; doi:10.3389/fmicb.2017.00237), 2017-02-17
Supplement: Image1.pdf [file Image1.pdf]

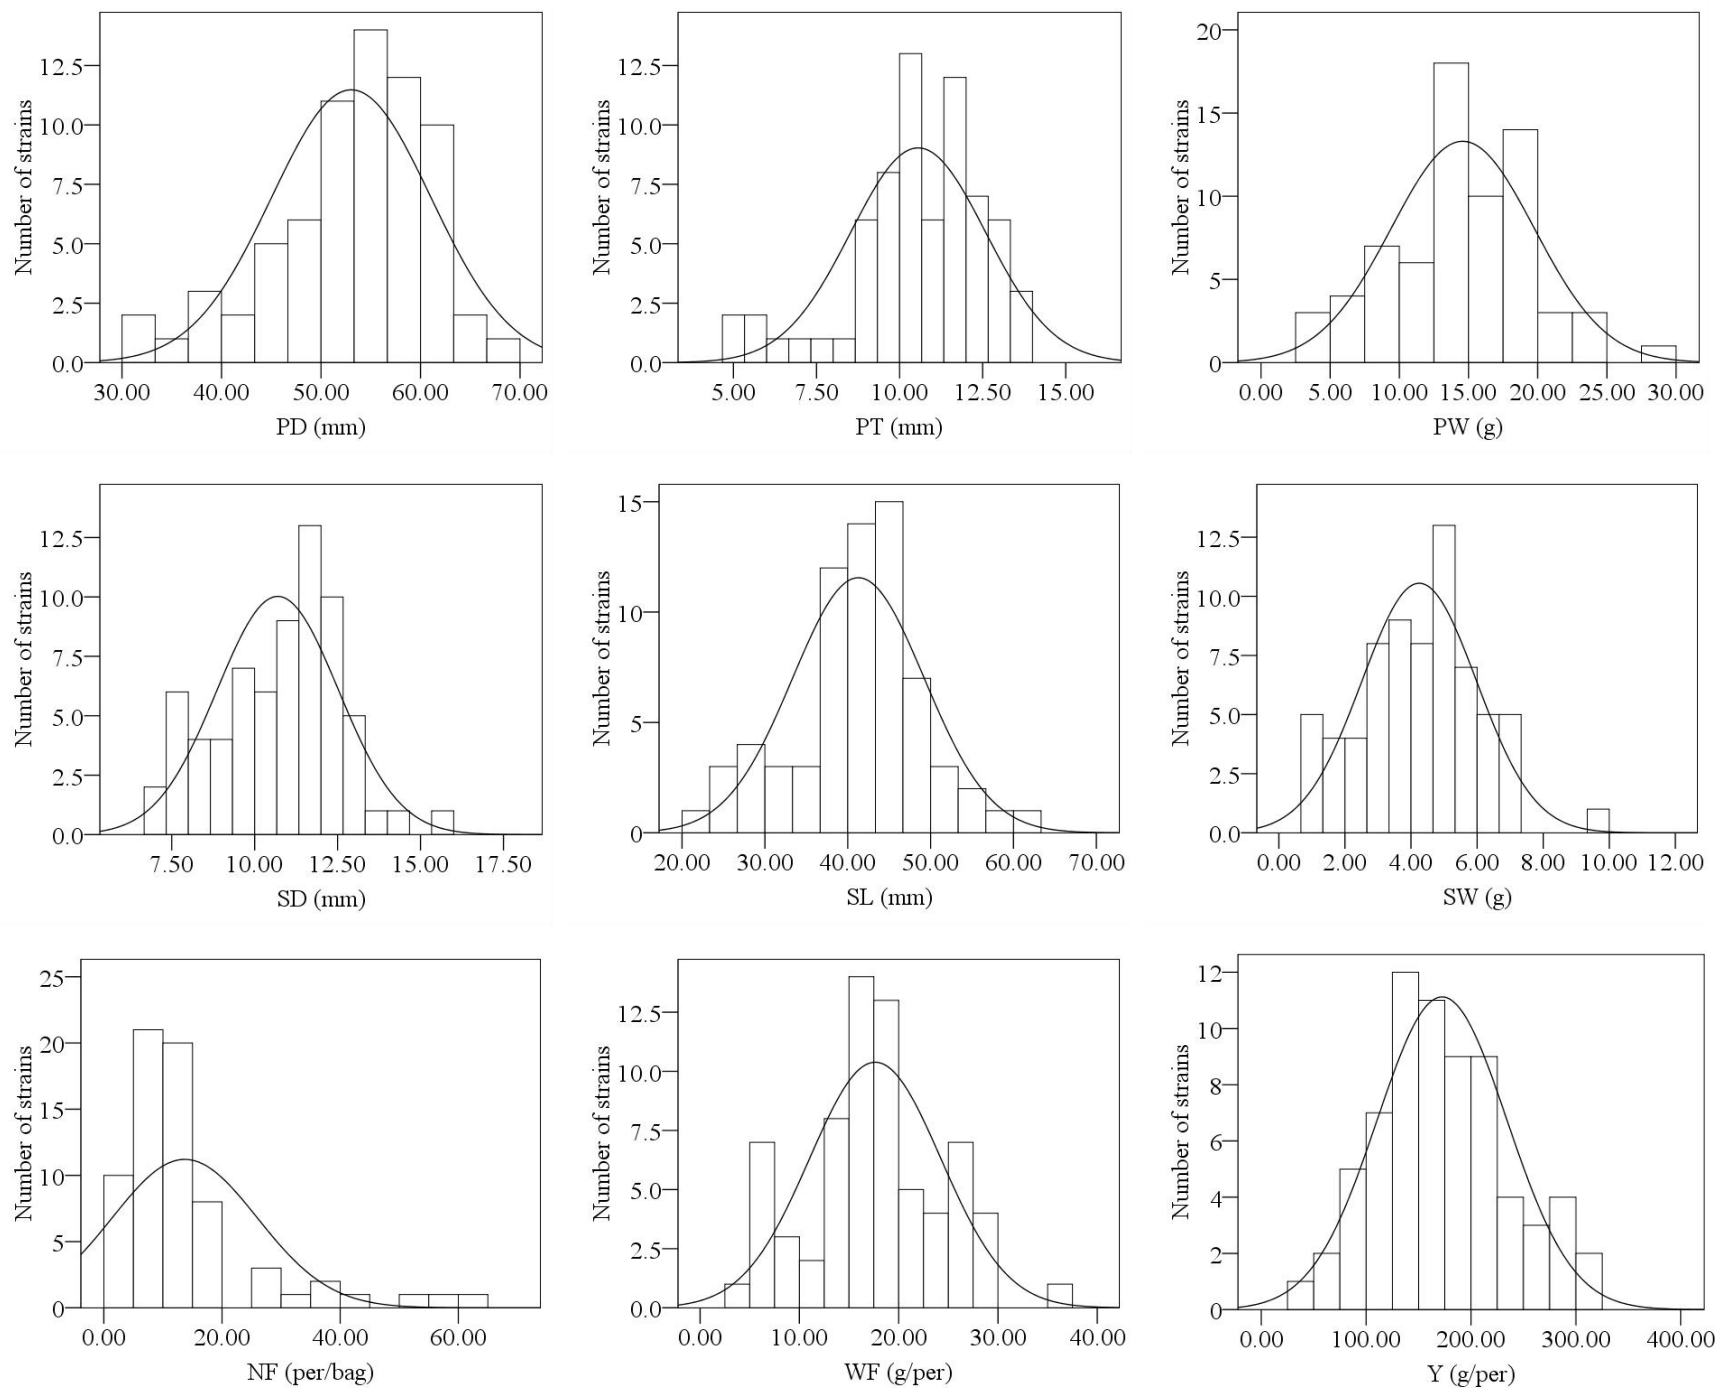

**Supplementary Figure S1. Histograms showing frequency distribution of nine agronomic traits in 2014.** The y-axis denotes the number of strains, whereas the x-axis indicates value range of traits.
