# Supplementary material for: Association Mapping Reveals Genetic Loci Associated with Important Agronomic Traits in Lentinula edodes, Shiitake Mushroom
Source: PubMed Central journal article supplement (PMC5314409; doi:10.3389/fmicb.2017.00237), 2017-02-17
Supplement: Image5.pdf [file Image5.pdf]

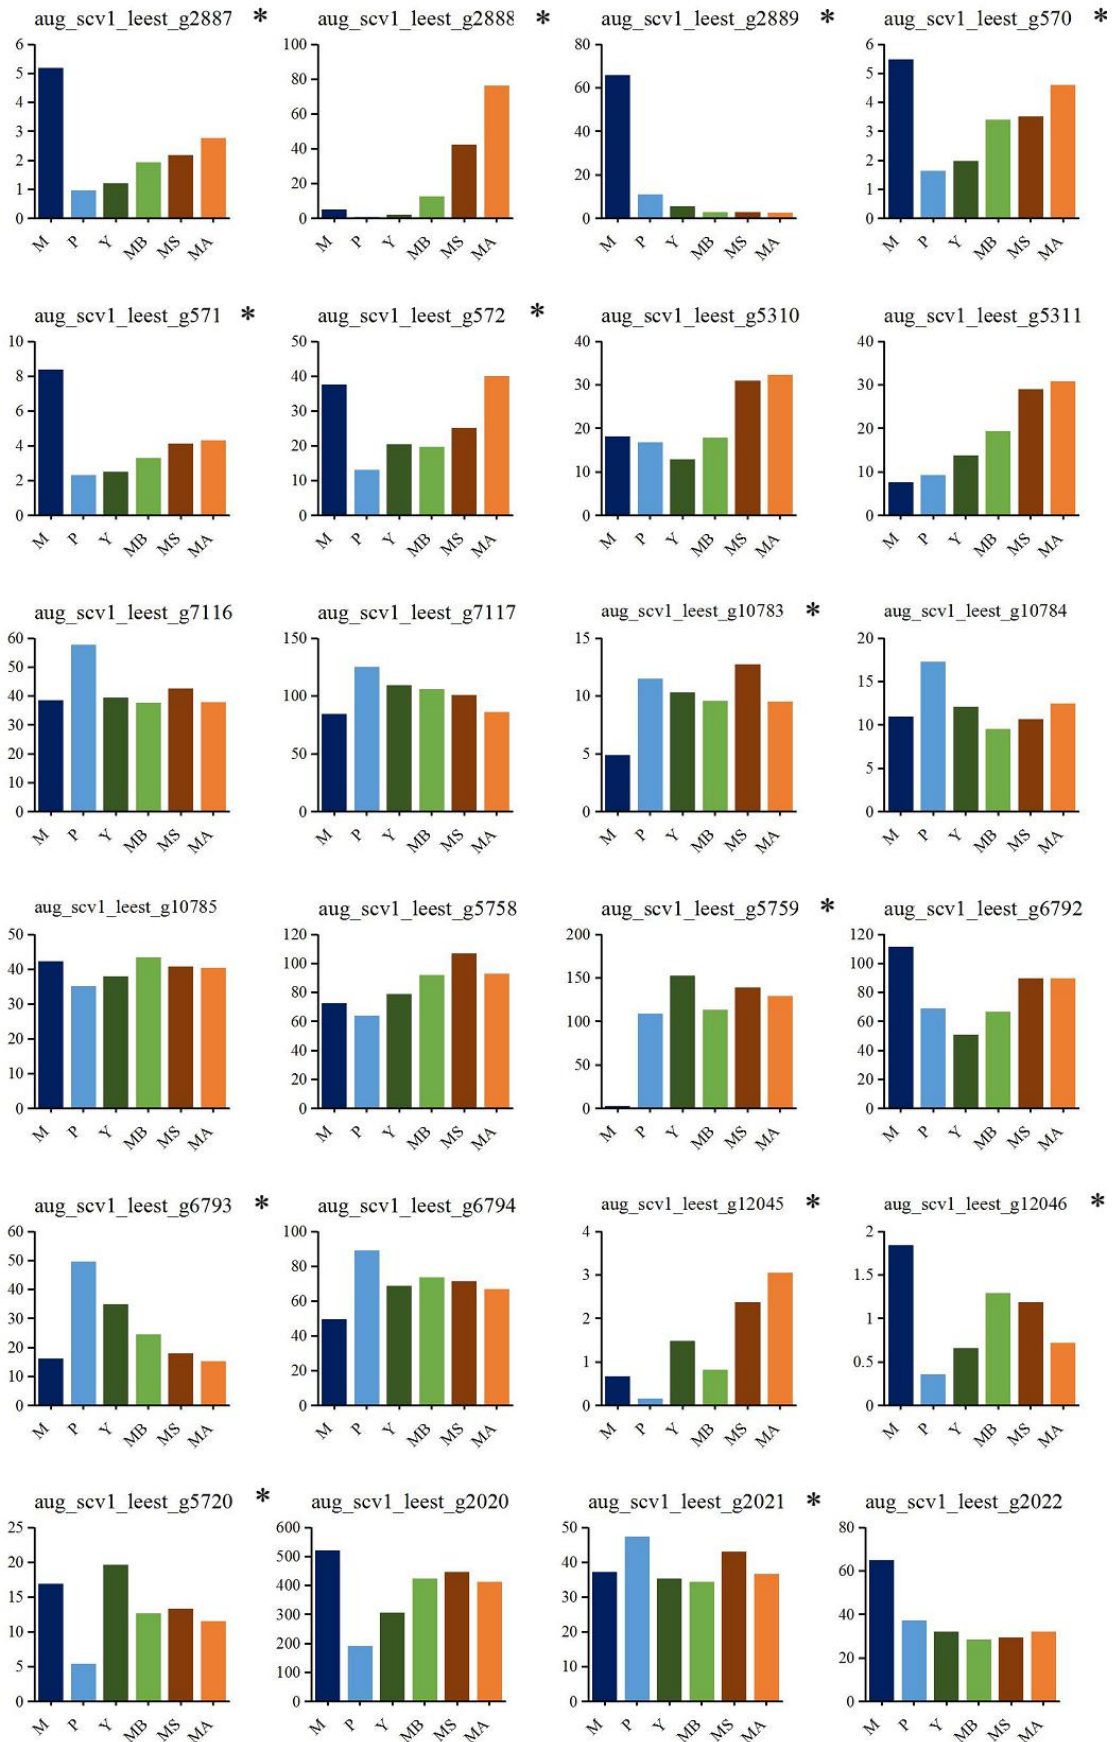

**Supplementary Figure S5. Expression levels of 24 genes containing or close to**

**trait-associated markers identified previously or detected in both years in shiitake strain L54.** Data here are from our unpublished RNA-seq data. Gene expression levels were normalized by RPKM (reads per kilo base per million mapped reads). M: Mycelium incubated in 12 hours light/12 hours dark; P: Primordium; Y: Young fruiting body; MB: Mature fruiting body before sporulation; MS: Mature fruiting body during sporulation; MA: Mature fruiting body after sporulation. \* Genes with a >2-fold expression change between M and P stages.
